# Supplementary material for: Absence of in-flight transmission of SARS-CoV-2 likely due to use of face masks on board
Source: Oxford University Press journal article supplement (doi:10.1093/jtm/taaa117), 2020-07-07
Supplement: supplemntal_information_table_taaa117.docx [file supplemntal_information_table_taaa117.docx]

**Supplemental information on the 2 positive patients:**

| **Parameter** | **Patient 1** | **Patient 2** |
| --- | --- | --- |
| Age; Gender | 76; M | 62; F |
| Background diseases | Healthy | S/P CVA, Hypothyroidism, Hypercholesterolemia |
| Date of positive SARS-COV-2 PCR | 23 Feb 2020 | 21 Feb 2020 |
| First Ct value | 34 | 24 |
| Number of positive days | 4 days | 26 days |
| Imaging | Right lower lobe ground glass opacities | Not performed |
| Date of last positive PCR | 26 Feb 2020 | 17 Mar 2020 |
| Date of positive viral culture | No culture was done | 23 Feb 2020 |
| Symptoms while positive | None | None |
